# Supplementary material
Source: PubMed Central journal article supplement (PMC6589432)
Supplement: NIHMS1035564-supplement-1.pdf [file NIHMS1035564-supplement-1.pdf]

**SUPPLEMENTARY TABLE 1. EUS findings in HRIs and control subjects stratified by alcohol use**

| Outcome variable       | No alcohol use               |                  |         | Alcohol use                  |               |         |
|------------------------|------------------------------|------------------|---------|------------------------------|---------------|---------|
|                        | Control subjects<br>(n = 76) | HRIs<br>(n = 27) | P value | Control subjects<br>(n = 42) | HRIs (n = 38) | P value |
| 3+ CP changes          | 0 (0)                        | 3 (11)           | .017*   | 2 (5)                        | 9 (24)        | .021†   |
| Hyperechoic strands    | 2 (3)                        | 9 (33)           | <.001*  | 3 (7)                        | 13 (34)       | .003†   |
| Lobularity             | 2 (3)                        | 4 (15)           | .039*   | 3 (7)                        | 10 (26)       | .020†   |
| Cysts                  | 0 (0)                        | 6 (22)           | <.001*  | 1 (2)                        | 10 (26)       | .002†   |
| Hyperechoic duct walls | 0 (0)                        | 6 (22)           | <.001*  | 3 (7)                        | 9 (24)        | .039†   |
| Hypoechoic foci        | 1 (1)                        | 5 (19)           | .004*   | 2 (5)                        | 8 (21)        | .041*   |

Values are n (%).

HRI, High-risk individual; CP, chronic pancreatitis.

\*Fisher exact test.

†Pearson  $\chi^2$  test.
